# Supplementary material for: Formation of PCP pincer cobalt complexes with cobaltacyclopropane moieties via double Csp3–H bond activation
Source: Royal Society of Chemistry journal article supplement (doi:10.1039/c5ra01230a), 2015-01-01
Supplement: c5ra01230a1.pdf [file c5ra01230a1.pdf]

**Formation of PCP pincer cobalt complexes with cobaltacyclopropane moieties  
via double C<sub>sp3</sub>-H bond activation**

Gengyu Zhu<sup>a</sup>, Lin Wang<sup>a</sup>, Hongjian Sun and Xiaoyan Li \*

*School of Chemistry and Chemical Engineering, Key Laboratory of Special  
Functional Aggregated Materials, Ministry of Education, Shandong University,  
Shanda Nanlu 27, 250100 Jinan, People's Republic of China*

**Electronic Supporting Information**

Spectra for **H2-H6** and **2 - 6**



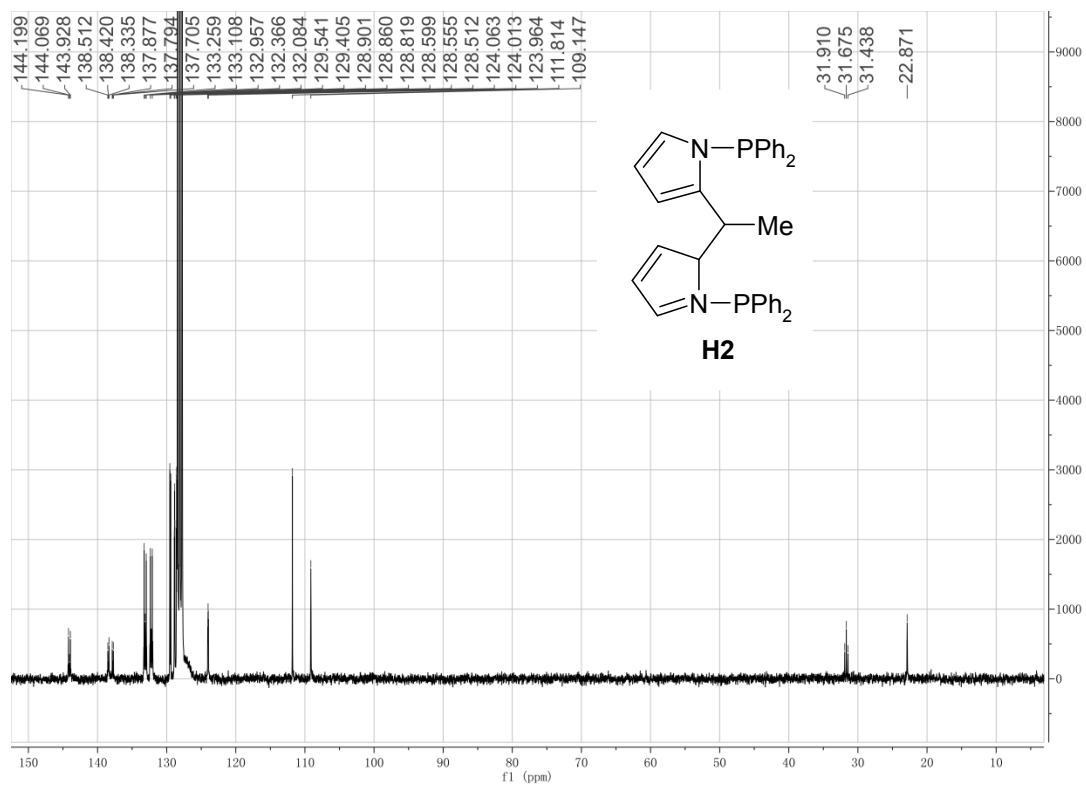

**<sup>1</sup>H NMR spectrum (CDCl<sub>3</sub>)**

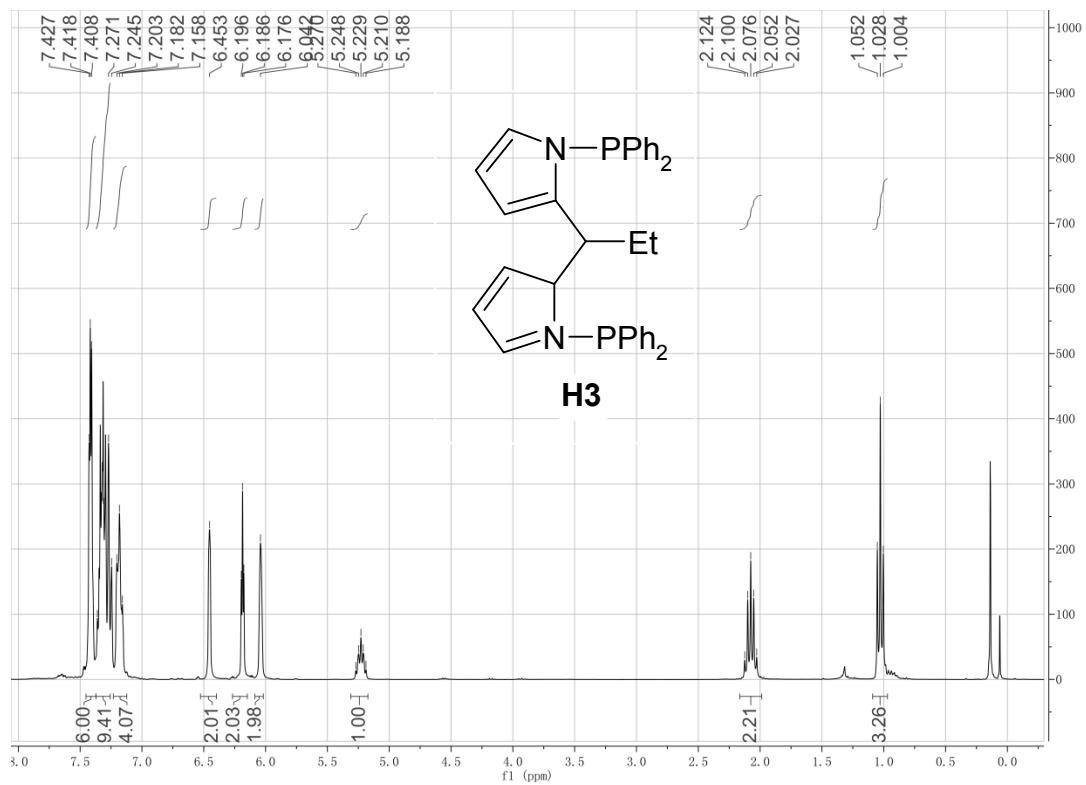

**<sup>31</sup>P NMR spectrum (CDCl<sub>3</sub>)**

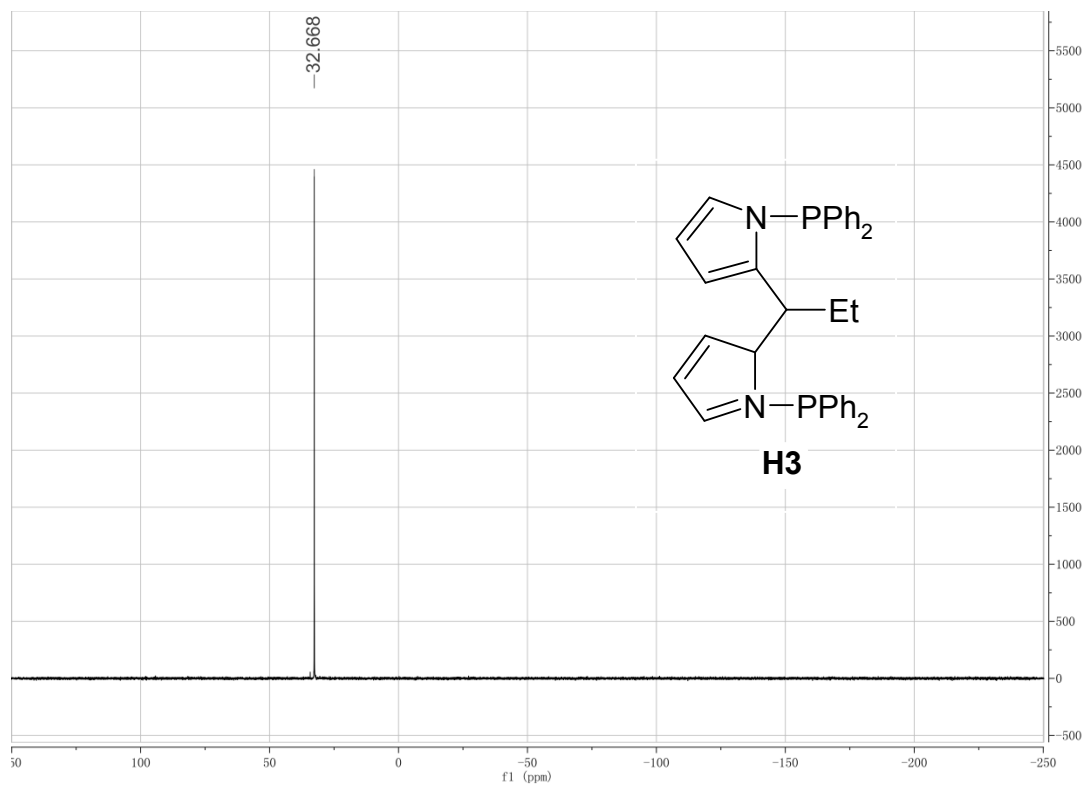

**<sup>13</sup>C NMR spectrum (CDCl<sub>3</sub>)**

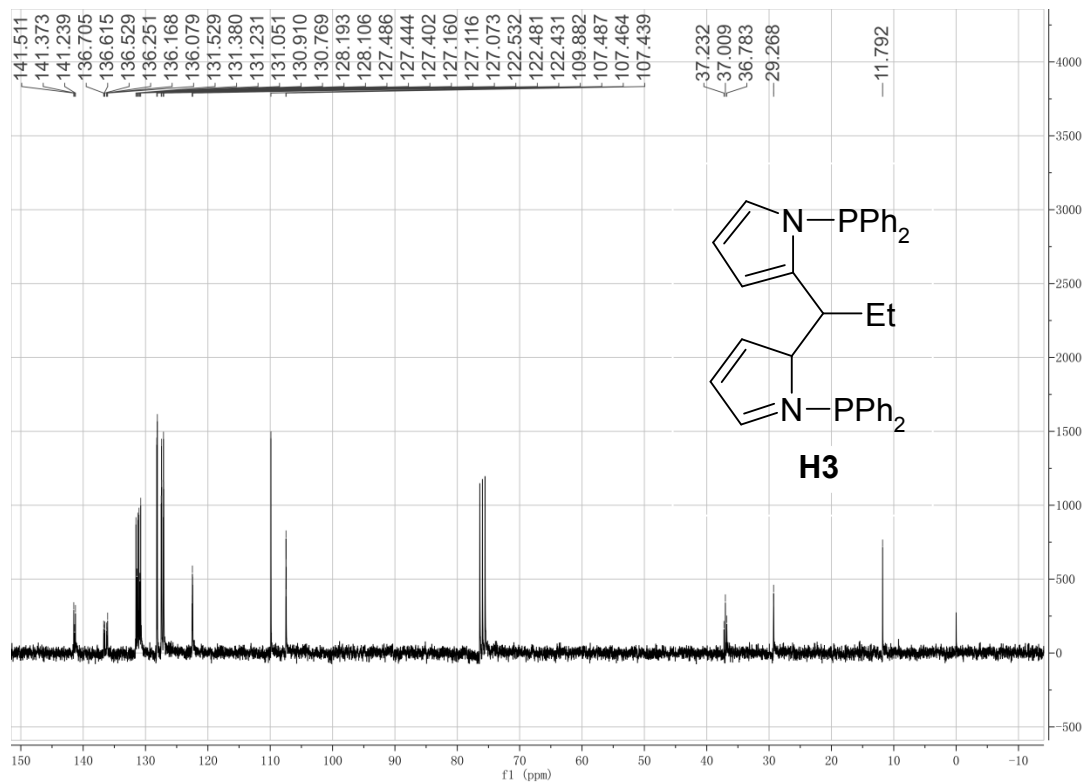

**<sup>1</sup>H NMR spectrum (C<sub>6</sub>D<sub>6</sub>)**

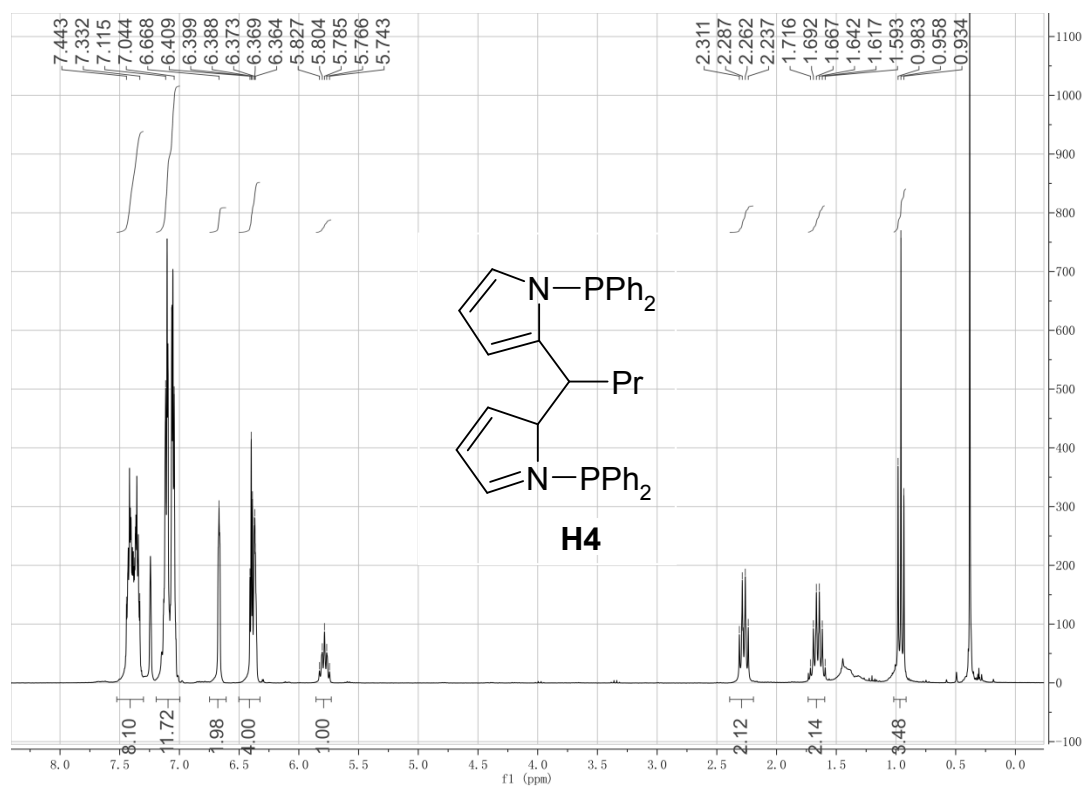

**<sup>31</sup>P NMR spectrum (C<sub>6</sub>D<sub>6</sub>)**

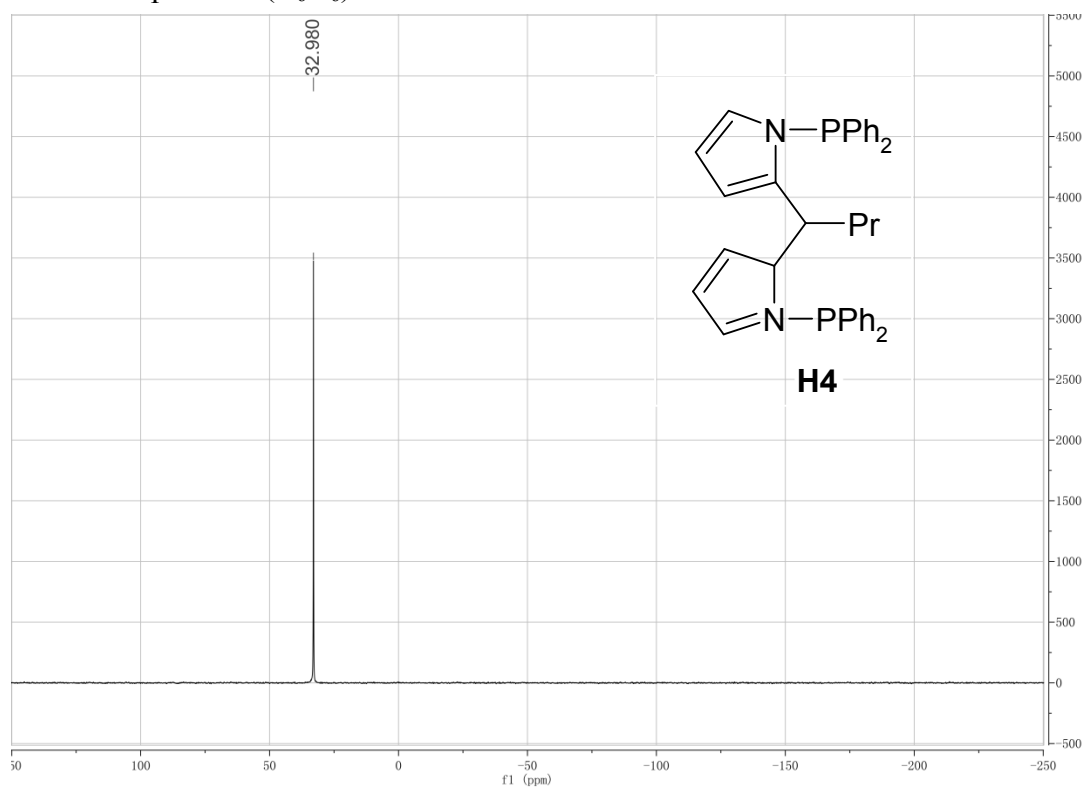

**<sup>13</sup>C NMR spectrum (C<sub>6</sub>D<sub>6</sub>)**



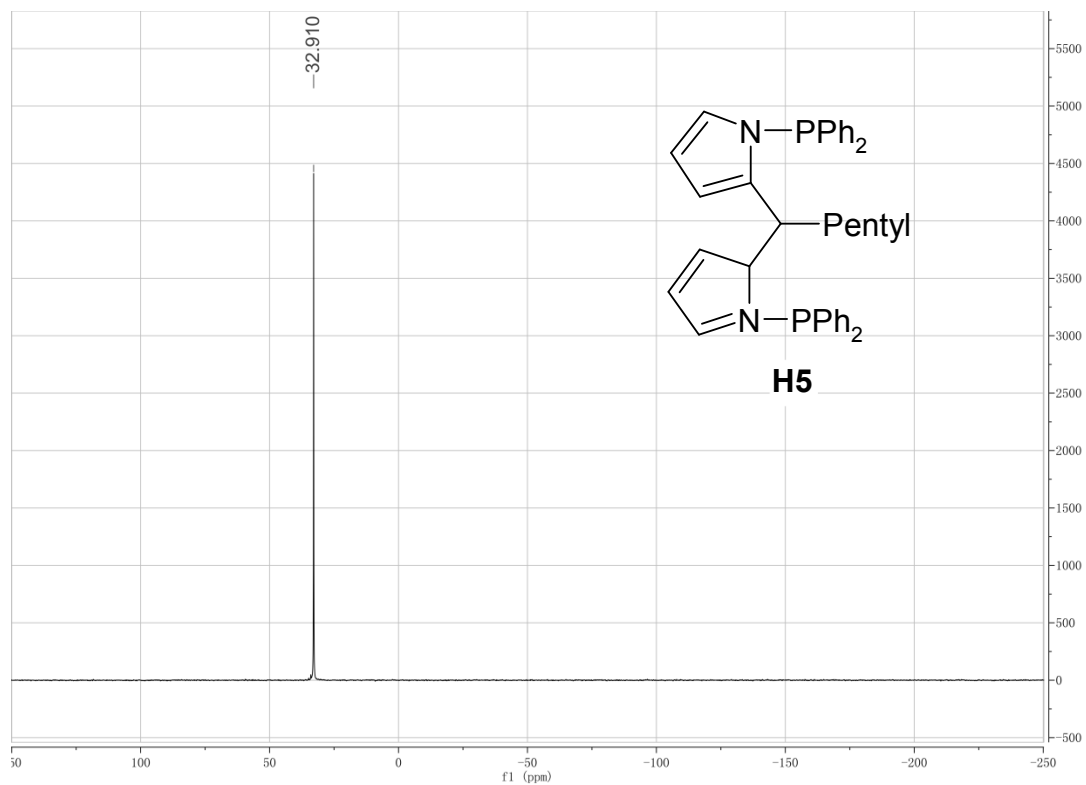

**<sup>13</sup>C NMR spectrum (C<sub>6</sub>D<sub>6</sub>)**

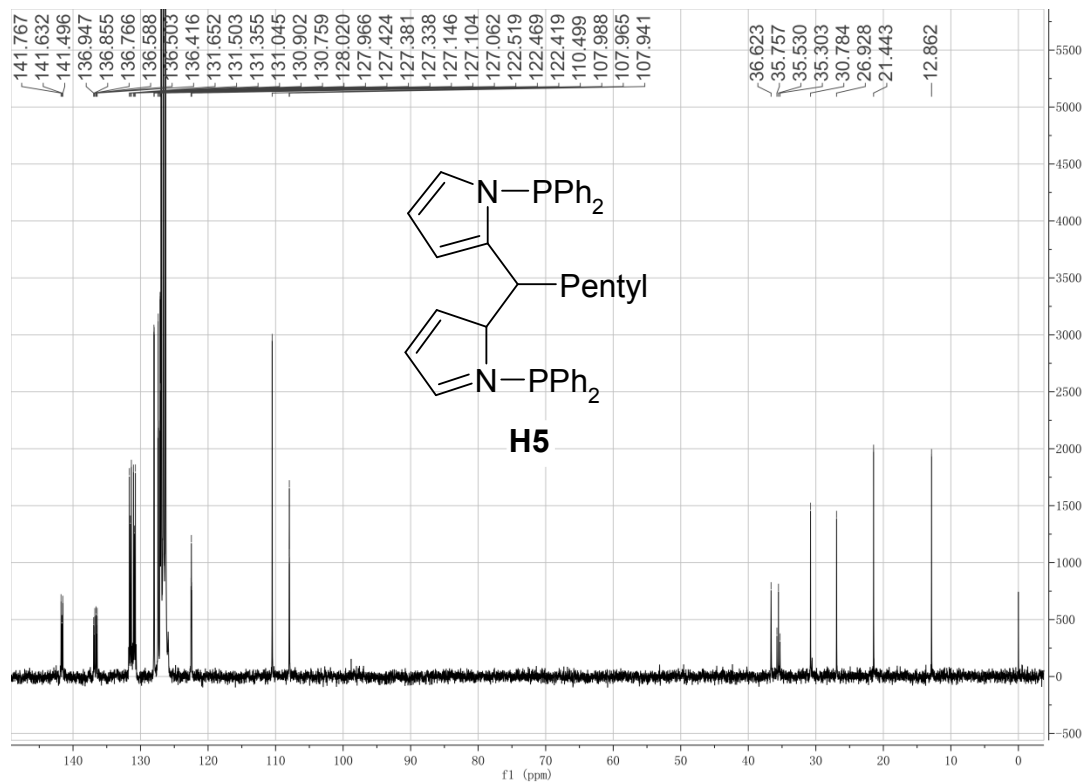

**<sup>1</sup>H NMR spectrum (C<sub>6</sub>D<sub>6</sub>)**

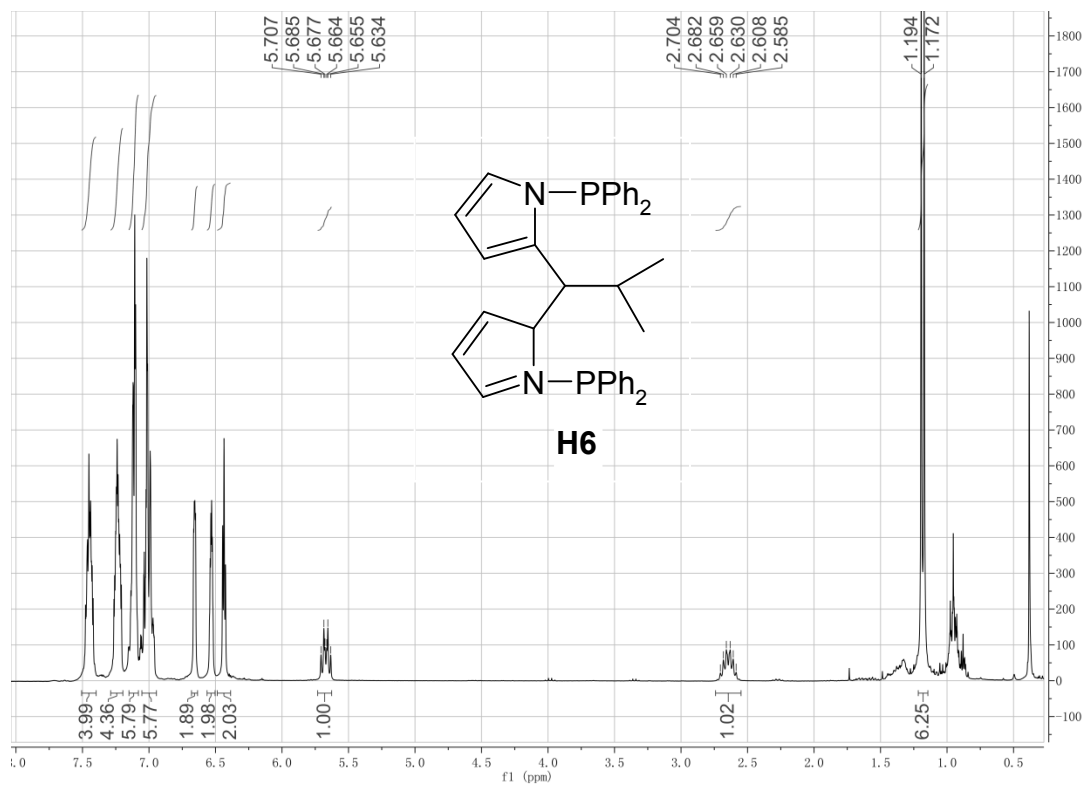

**<sup>31</sup>P NMR spectrum (C<sub>6</sub>D<sub>6</sub>)**

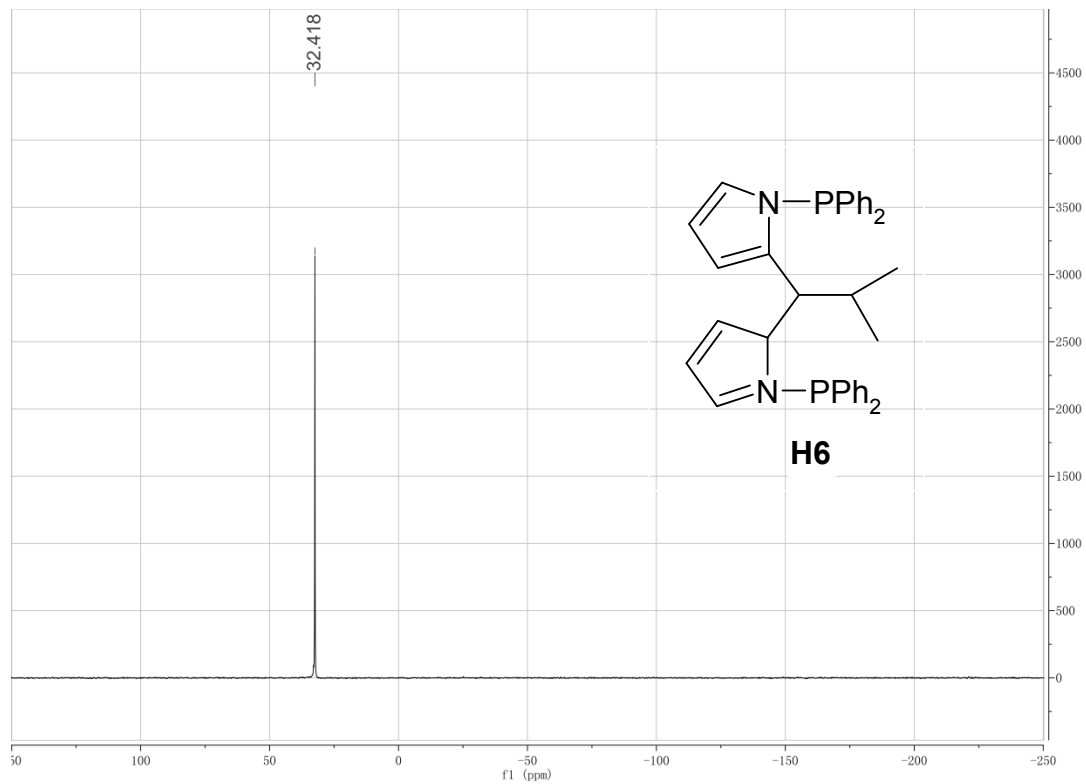

**<sup>13</sup>C NMR spectrum (C<sub>6</sub>D<sub>6</sub>)**



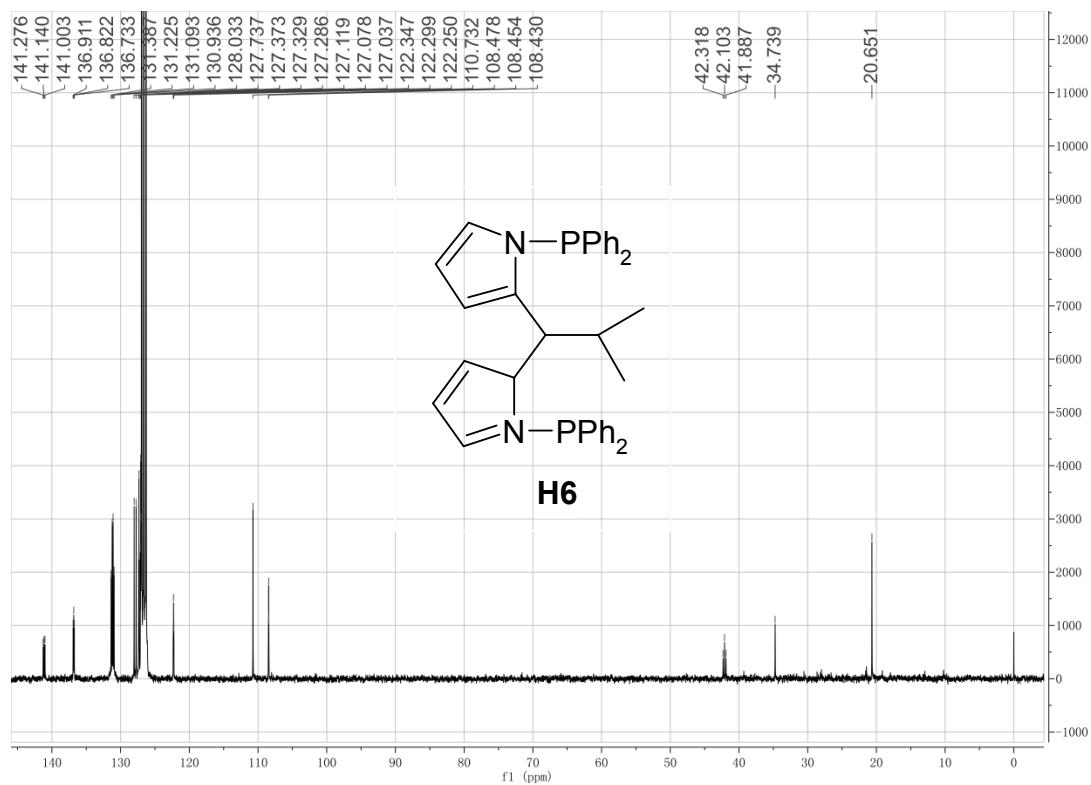

### NMR Data of Complexes 2—6

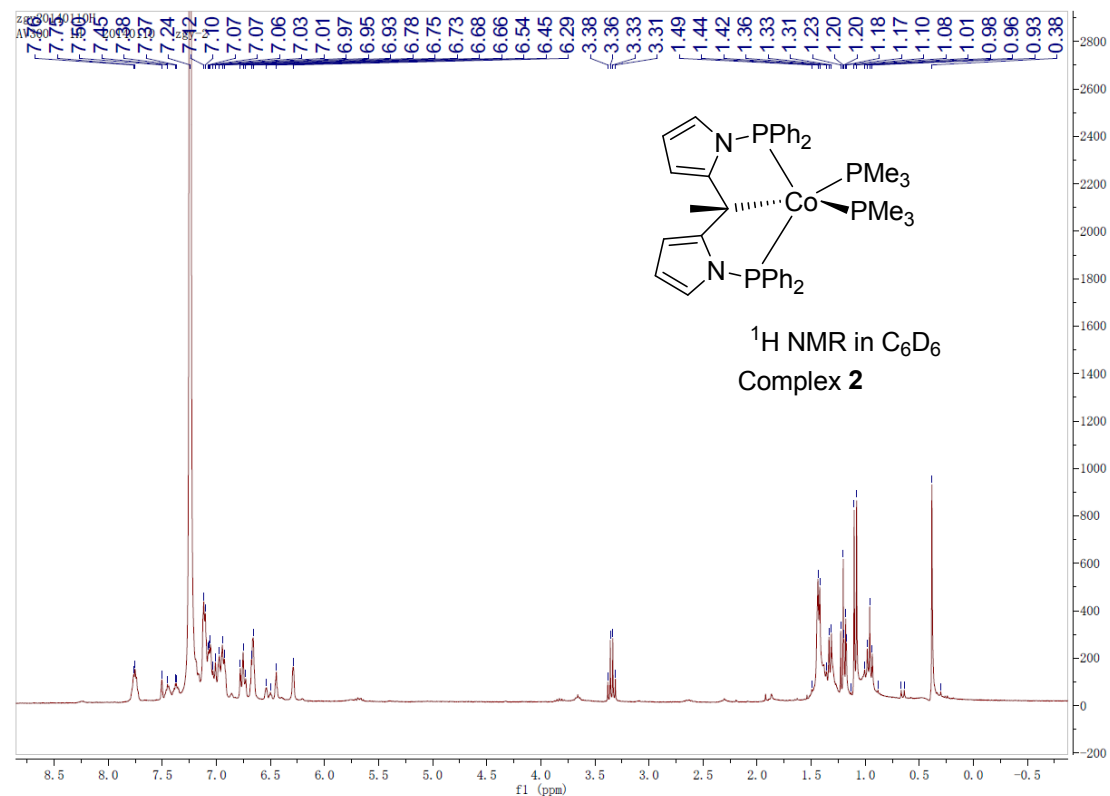

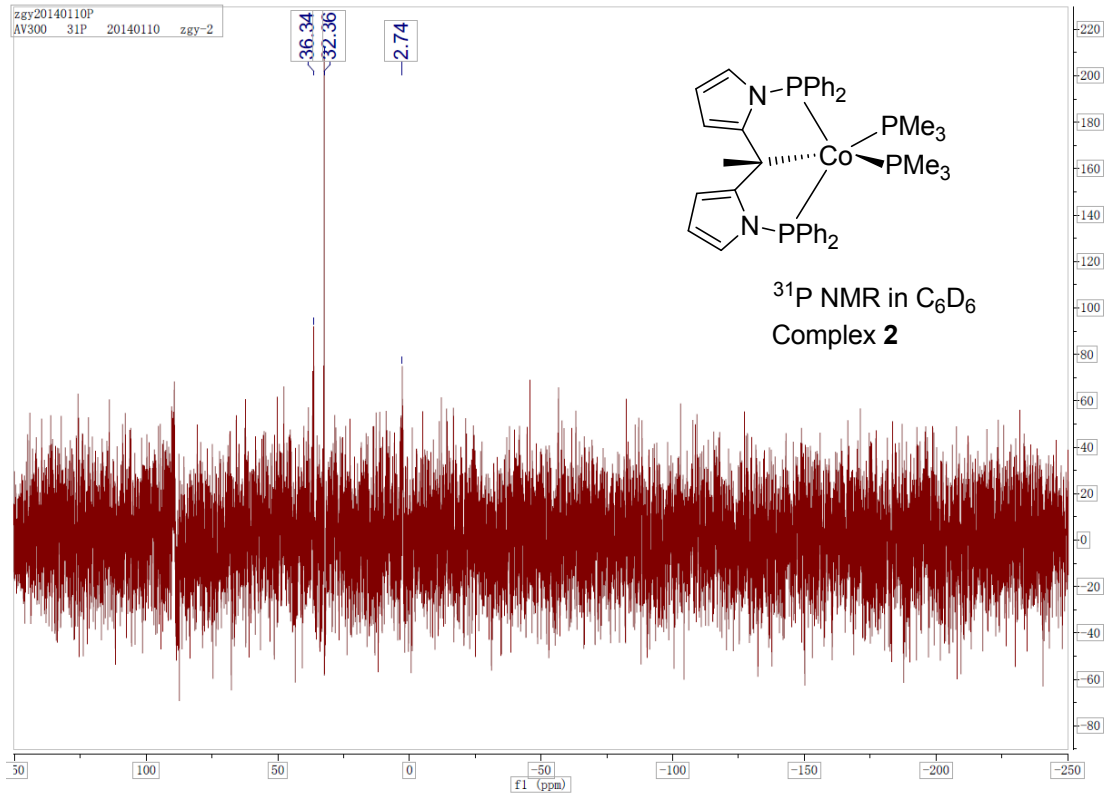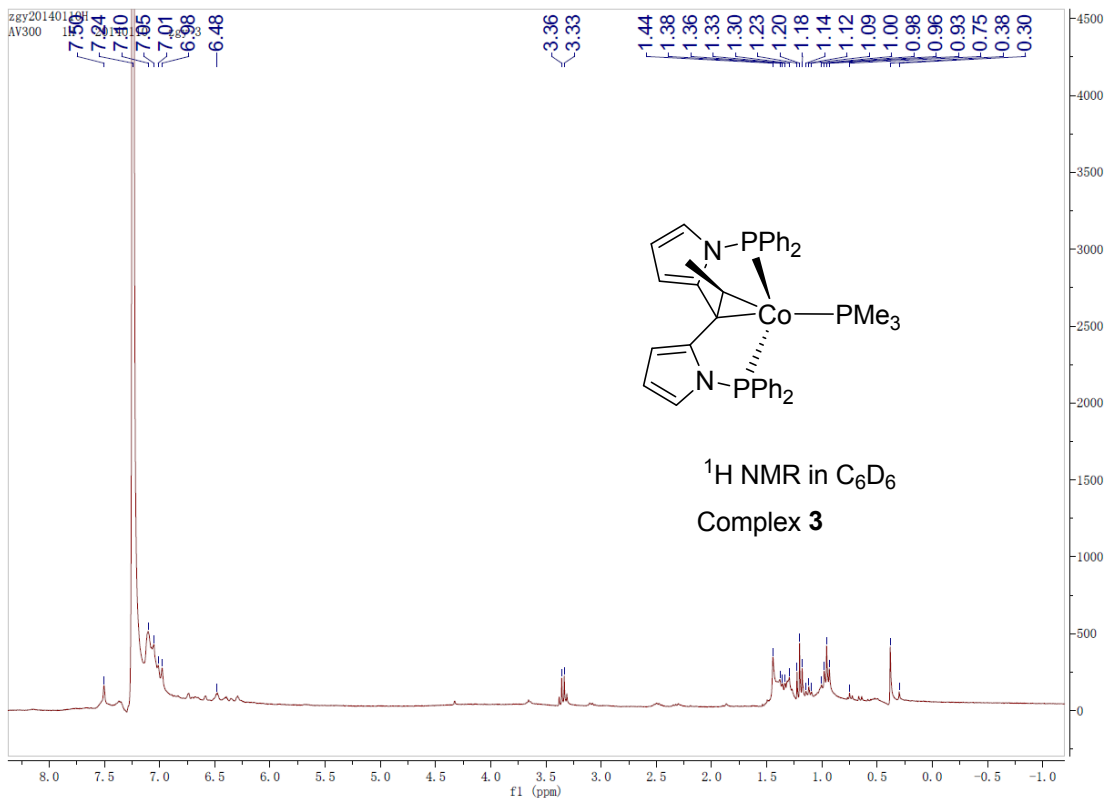

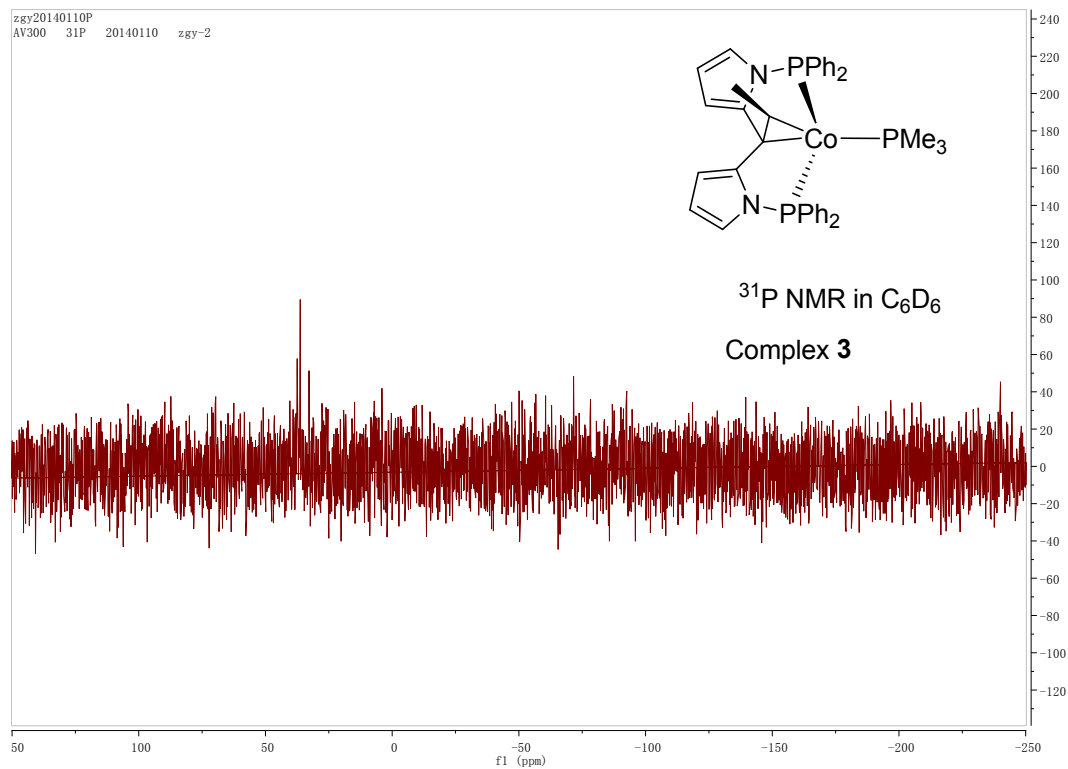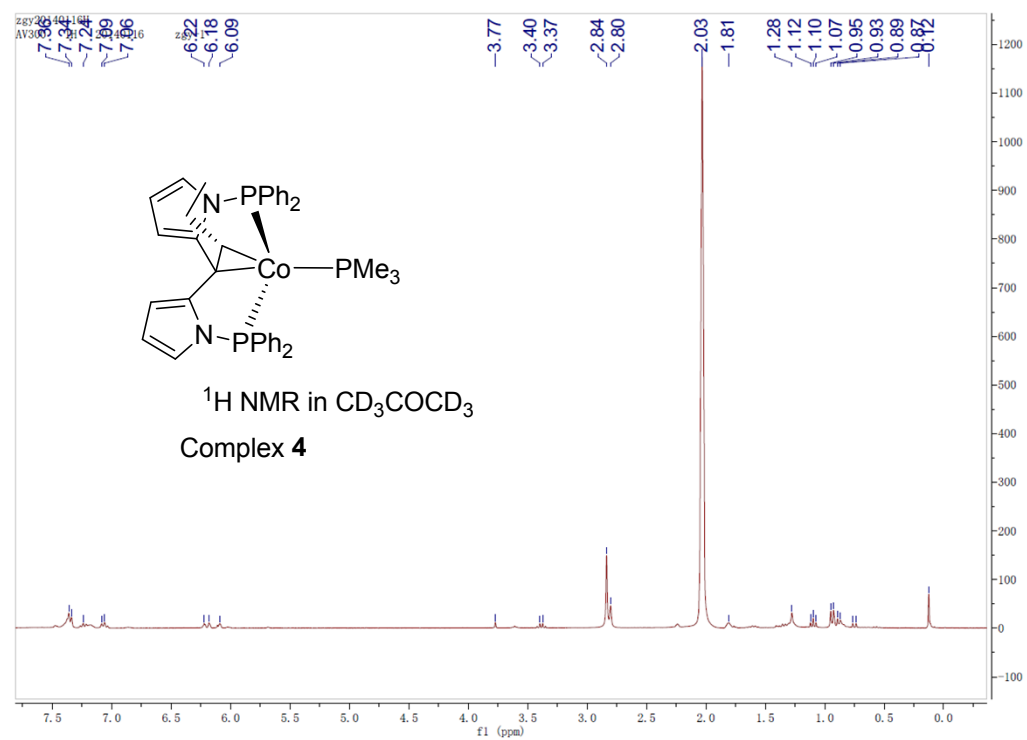





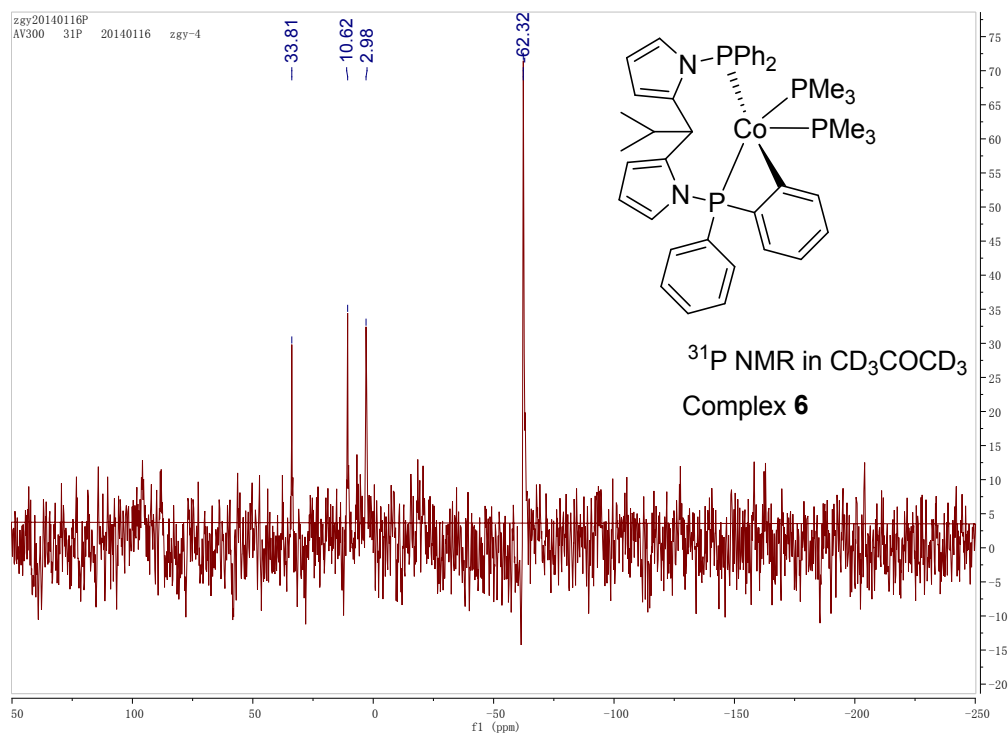

## 6. Reference

- (1) Klein, H.; Karsch, H. H. *Chem. Ber.* **1975**, *108*, 944.
- (2) Zhu, G.; Li, X.; Xu, G.; Wang, L.; Sun, H. *Dalton Trans.*, **2014**, *43*, 8595.
- (3) Sheldrick, G. *Acta Crystallogr.* **2008**, *64*, 112.
